# Supplementary material for: Molecular analysis of polysaccharide accumulation in Dendrobium nobile infected with the mycorrhizal fungus Mycena sp.
Source: Royal Society of Chemistry journal article supplement (doi:10.1039/c7ra02010d), 2017-01-01
Supplement: c7ra02010d1.pdf [file c7ra02010d1.pdf]

## Molecular analysis of polysaccharide accumulation in *Dendrobium*

### *nobile* infected with the mycorrhizal fungus *Mycena* sp.

Qing Li, Bing Li, Li-Si Zhou, Gang Ding, Biao Li\* & Shun-Xing Guo\*

Institute of Medicinal Plant Development, Peking Union Medical College, Chinese Academy of Medical Sciences, Beijing 100193, People's Republic of China

\*Corresponding author: B. L. [libiao@126.com](mailto:libiao@126.com); S. X. G. [sxguo1986@163.com](mailto:sxguo1986@163.com)

Supplementary Table 1. Primers designed for qRT-PCR.

Supplementary Table 2. Unigenes involved in mannose metabolism and respiration.

Supplementary Table 1. Primers designed for qRT-PCR.

| Genes       | Unigene ID | forward primer sequence (5'-3') | reverse primer sequence (5'-3') |
|-------------|------------|---------------------------------|---------------------------------|
| <i>petJ</i> | c75563_g2  | CCTCACCTTATCCATTCTCTCCTC        | TCCTCTTCTGTTACCAATCCATTCC       |
| <i>petF</i> | c72738_g2  | CCTGAGCAGACTGTGGAGATTGAG        | ACAGGAAGAGCACGCACCAG            |
| <i>bcsA</i> | c92372_g2  | CCTGCGAGTGCAGTTCAAGAT           | ACCTCCTCCACATCAGTAGCCTTAT       |
| <i>SUS</i>  | c89528_g2  | ACTCCTTGTGGTCATCACCTTGAGA       | ACTGTTCCATTGCCAGAAGCCTTG        |
| <i>glgA</i> | c85783_g1  | TGTGGTGGTGTCTGTTATGGAGATG       | CGTCCCTGGTGTGCTATATTGTGTA       |
| <i>PMM</i>  | c87473_g1  | GGTAGTTACAGTTGGTGTCTGTTGGA      | GGTCAGCAATATAATGGAGCGTGAA       |
| <i>GMPP</i> | C78968_g3  | GCTGCTTGATTGGTCCTGATGTTG        | TGCCGCCATTGCTGTAGATTTC          |
| <i>DLAT</i> | C79925_g1  | CAACAACCAAGGCTTCTCCACAGT        | TCACAGAGCACTTCACCAGGAGAG        |
| <i>PDHB</i> | C86762_g1  | AATGGTGCTGCTGCTGGAGTTG          | ACAGGGAAGGATTCCCGTATAGT         |
| <i>CS</i>   | c84968_g3  | GGACCTCTTCATGGCTTGGCTAAT        | ATGACCGTAACCAGGCACAACC          |
| <i>SDHA</i> | c86957_g3  | TGGTGCTGGCTGTCTCATTACTG         | TGGAGGTAGGTGATTGAGGTGTAGA       |
| <i>PFK</i>  | c86638_g1  | GCTGGTTATGTTCTGGAGGATGTG        | TGCTTGACAACCTGAATATGCTGGAT      |
| <i>PGK</i>  | c89109_g2  | CGATGGCAACCTCAAGATCAACGA        | ACAAGATGACAGCAGAGAAGCAAC        |
|             |            |                                 | T                               |

Supplementary Table 2. Unigenes involved in mannose metabolism and respiration

| Direction of Carbon Flow | Pathway                         | Gene Name                                               | Number | Unigene ID                                 |
|--------------------------|---------------------------------|---------------------------------------------------------|--------|--------------------------------------------|
| Biosynthesis             | Fructose and mannose metabolism | phosphomannomutase ( <i>PMM</i> )                       | 1      | c87473_g1                                  |
|                          |                                 | mannose-1-phosphate guanylyltransferase ( <i>GMPP</i> ) | 4      | c78968_g3, c83966_g1, c85209_g4, c82316_g3 |

|             |                                                                                       |    |                                                                      |
|-------------|---------------------------------------------------------------------------------------|----|----------------------------------------------------------------------|
|             | pyruvate dehydrogenase E2 component<br>(dihydrolipoamide<br>acetyltransferase) (DLAT) | 4  | c79925_g1, c91244_g2<br>c90714_g7, c78811_g1                         |
| Consumption | Citrate cycle<br>(TCA cycle)                                                          |    |                                                                      |
|             | pyruvate dehydrogenase E1 component beta<br>subunit( <i>PDHB</i> )                    | 3  | c86762_g1, c84071_g1<br>c75446_g1                                    |
|             | succinate dehydrogenase (ubiquinone)<br>flavoprotein subunit ( <i>SDHA</i> )          | 1  | c86957_g3                                                            |
|             | citrate synthase ( <i>CS</i> )                                                        | 1  | c84968_g3                                                            |
|             | Glycolysis /<br>Gluconeogenesis                                                       |    | c86638_g1, c86638_g2<br>c72057_g1, c49542_g2                         |
|             | 6-phosphofructokinase 1 ( <i>PFK</i> )<br>s                                           | 10 | c90207_g3, c92755_g1<br>c75196_g1, c75196_g2<br>c49542_g1, c87231_g1 |

---
